# Supplementary material for: Targeting BCL-XL in fibrolamellar hepatocellular carcinoma
Source: PubMed Central journal article supplement (PMC9536265; doi:10.1172/jci.insight.161820), 2022-09-08
Supplement: jciinsight-7-161820-s106.pdf [file jciinsight-7-161820-s106.pdf]

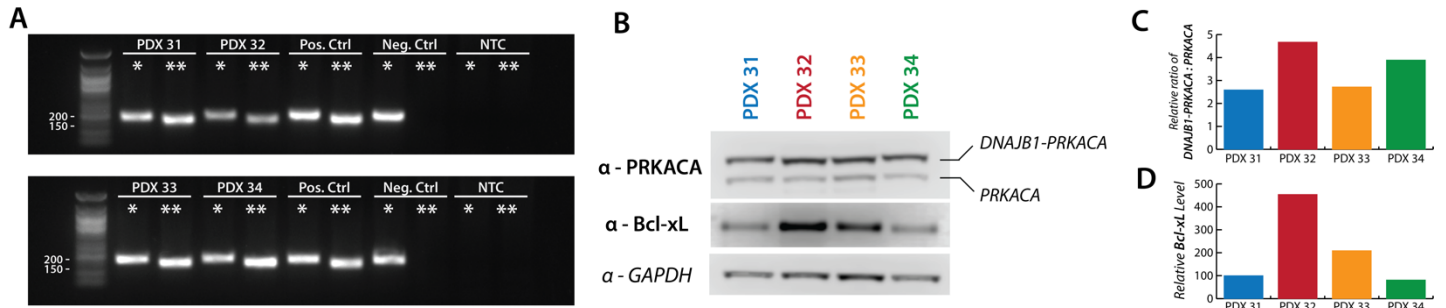

Supplemental Figure 1

**Figure S1: A. One-Step RT-PCR of PDX 31, 32, 33, and 34.** Wild-type PRKACA (\*) amplicon is expected at 184. DNAJB1-PRKACA (\*\*) Amplicon is expected at 160. Pos. Ctrl: Previously validated patient sample. Neg. Ctrl: Hepatocellular carcinoma (HCC) patient sample, contains no DNJB1-PRKACA. NTC: No template control. **(B,C) Fibrolamellar PDXs express DNAJB1-PRKACA and Bcl-xL.** Western blot on tissue from the four PDXs used.  $\alpha$ -PRKACA: an antibody that recognized the c-terminus of PRKACA, (also found in the DNAJB1-PRKACA chimera).  $\alpha$ -Bcl-xL: an antibody that specifically recognizes Bcl-xL.  $\alpha$ -GAPDH: Loading control. **C.** The relative ratio of DNAJB1-PRKACA expression to PRKACA in each PDX tumor line. **D.** The level of Bcl-xL relative to GAPDH in each PDX tumor line.

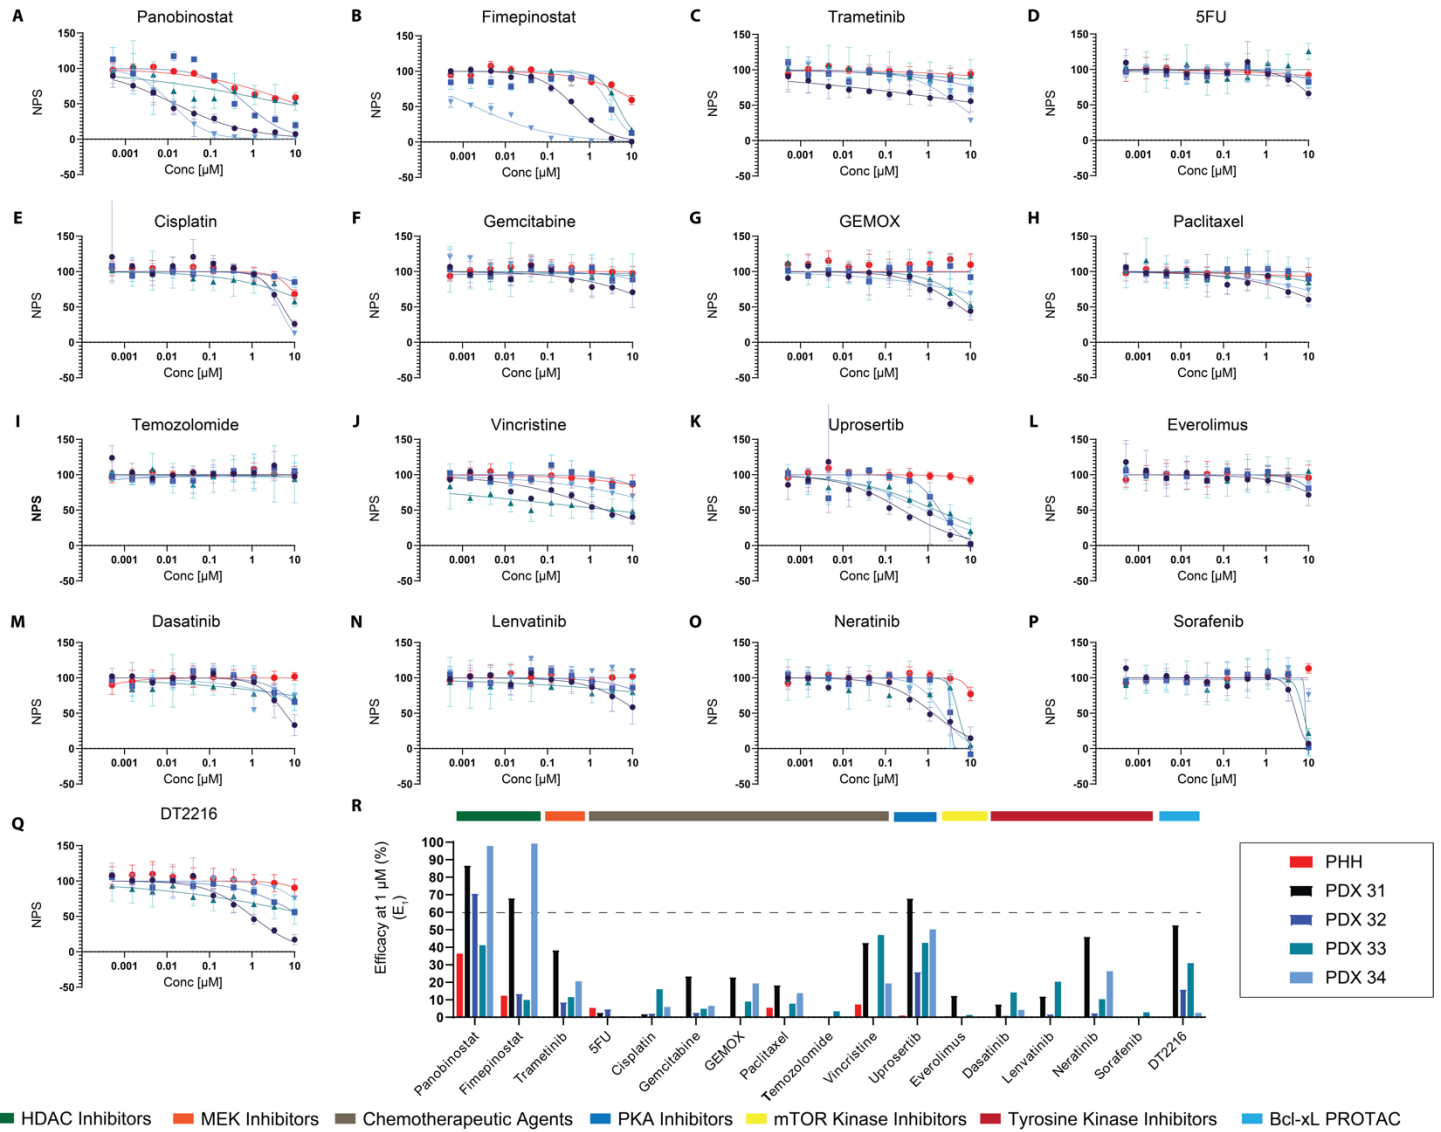

## Supplemental Figure 2:

**Figure S2: Dose-response curves of selected drugs.** **A – L:** dose-response curves of selected drugs tested against four FLC PDX lines and a PHH control. Drugs were tested at 10  $\mu\text{M}$  - 0.5 nM with 3-fold serial dilution. The y-axis shows normalized percentage survival calculated as  $[(\text{Positive control} - \text{drug response at a given dose}) / (\text{Positive control} - \text{Negative control})] \times 100$ . The x-axis shows the concentration in  $\mu\text{M}$ . **A and B. HDAC inhibitors** (panobinostat and fimepinostat), **C. MEK inhibitors** (trametinib), **D – J. Chemotherapeutic agents** (5-FU: 5-fluorouracil, cisplatin, gemcitabine, GEMOX: gemcitabine and oxaliplatin at a ratio of 10:1, paclitaxel, temozolomide and vincristine), **K. PKA inhibitors** (uprosertib), **L. mTOR kinase inhibitors** (everolimus), **M – P. Tyrosine kinase inhibitors** (dasatinib, lenvatinib, neratinib and sorafenib), **Q. PROTAC** (DT2216: a Bcl-xL specific degrader), Data presented as mean  $\pm$  SD (n=3) **R.** A plot of the efficacy at 1  $\mu\text{M}$  for all the drugs shown, comparing efficacy in PHH vs FLC PDX tumor lines. **NPS:** Normalized Percentage Survival.

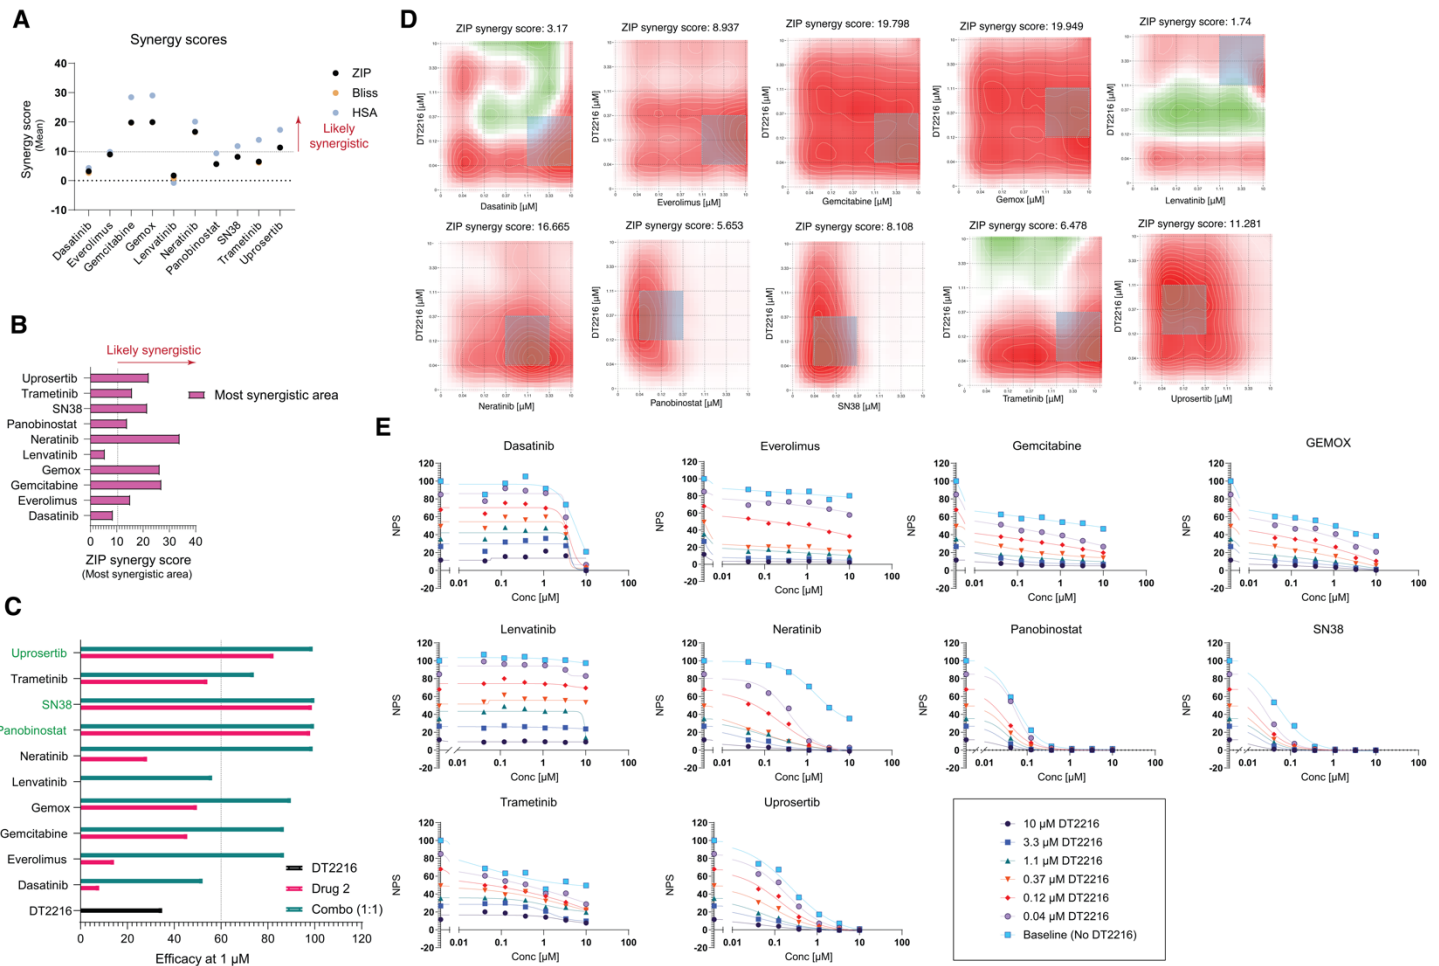

### Supplemental Figure 3:

**Fig. S3: DT2216 Anchor Screen for PDX 31.** **A.** Synergy scores (ZIP, Bliss and HSA) for DT2216 in PDX 31, **B.** The ZIP scores of the most synergistic area calculated for indicated drugs combined with DT2216, **C.** A plot of the efficacy (100% - Viability) at 1 μM for indicated drugs as single agents or combined with DT2216 (1:1), the dotted line marks the 60% efficacy, **D.** The 6 x 6 dose-response matrices and interaction landscapes of indicated drugs combined with DT2216. Cells were treated for 72 hrs and viability was measured using a cell-titer glo (Promega) assay, **E.** Dose-response curves of therapeutic agents in the screen vs an increasing dose of DT2216. Drugs were tested at 10 μM – 41 nM with 3-fold serial dilution. The y-axis shows normalized percentage survival calculated as  $[(\text{Positive control} - \text{drug response at a given dose}) / (\text{Positive control} - \text{Negative control})] \times 100$ . The x-axis shows the concentration in μM. The data is an overlay of the baseline dose-response curves from figures 2 and 1S along with the dose-response curves of increasing DT2216 doses. The y-axis is marked with the matching dose-response values for DT2216 in the absence of any other drug.

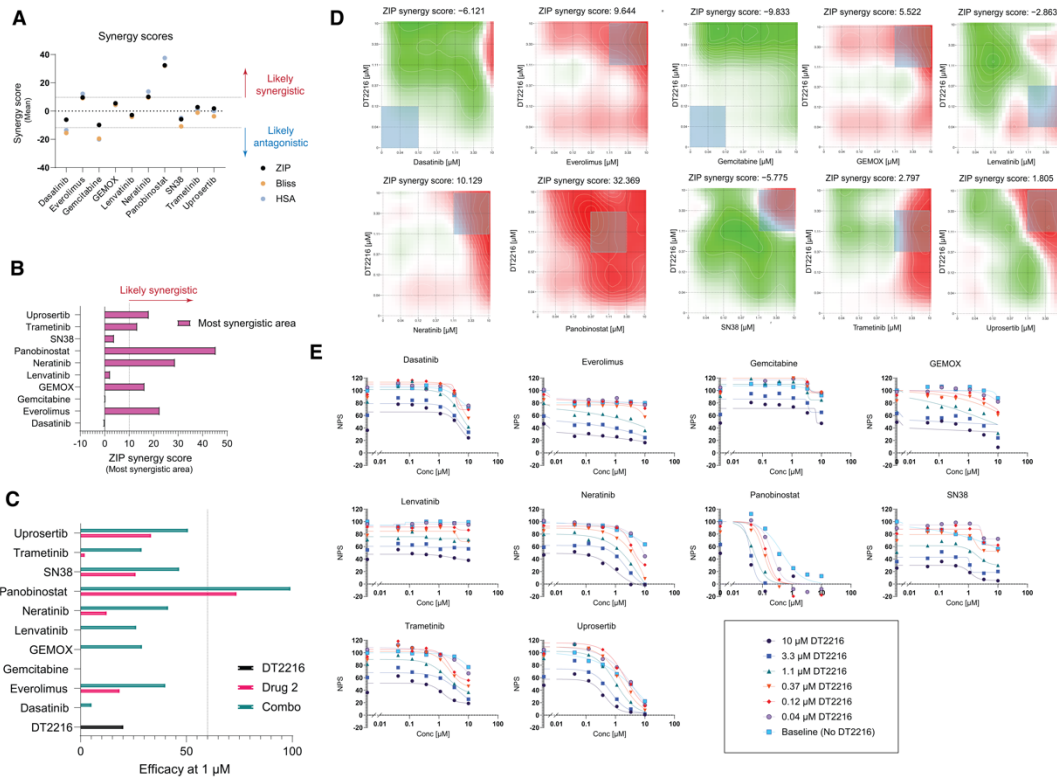

Supplemental Figure 4:

**Fig. S4: DT2216 Anchor Screen for PDX 32.** **A.** Synergy scores (ZIP, Bliss and HSA) for DT2216 in PDX 32, **B.** The ZIP scores of the most synergistic area calculated for indicated drugs combined with DT2216, **C.** A plot of the efficacy (100% - Viability) at 1  $\mu$ M for indicated drugs as single agents or combined with DT2216 (1:1), the dotted line marks the 40% efficacy, **D.** The 6 x 6 dose-response matrices and interaction landscapes of indicated drugs combined with DT2216. Cells were treated for 72 hrs and viability was measured using a cell-titer glo (Promega) assay, **E.** Dose-response curves of therapeutic agents in the screen vs an increasing dose of DT2216. Drugs were tested at 10  $\mu$ M – 41 nM with 3-fold serial dilution. The y-axis shows normalized percentage survival calculated as  $[(\text{Positive control} - \text{drug response at a given dose}) / (\text{Positive control} - \text{Negative control})] \times 100$ . The x-axis shows the concentration in  $\mu$ M. The data is an overlay of the baseline dose-response curves from figures 2 and 1S along with the dose-response curves of increasing DT2216 doses. The y-axis is marked with the matching dose-response values for DT2216 in the absence of any other drug.

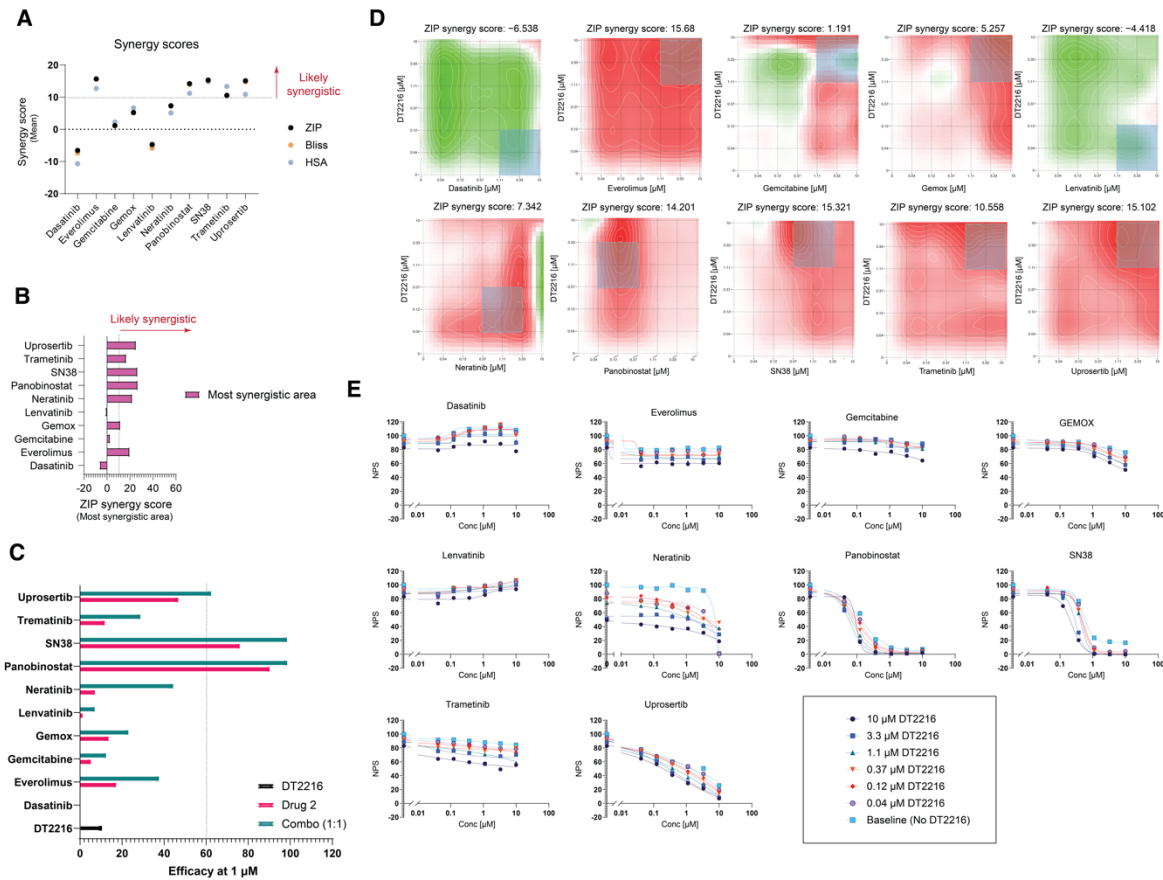

Supplemental Figure 5:

**Fig. S5: DT2216 Anchor Screen for PDX 33.** **A.** Synergy scores (ZIP, Bliss and HSA) for DT2216 in PDX 33, **B.** The ZIP scores of the most synergistic area calculated for indicated drugs combined with DT2216, **C.** A plot of the efficacy (100% - Viability) at 1 μM for indicated drugs as single agents or combined with DT2216 (1:1), the dotted line marks the 60% efficacy, **D.** The 6 x 6 dose-response matrices and interaction landscapes of indicated drugs combined with DT2216. Cells were treated for 72 hrs and viability was measured using a cell-titer glo (Promega) assay, **E.** Dose-response curves of therapeutic agents in the screen vs an increasing dose of DT2216. Drugs were tested at 10 μM – 41 nM with 3-fold serial dilution. The y-axis shows normalized percentage survival calculated as  $[(\text{Positive control} - \text{drug response at a given dose}) / (\text{Positive control} - \text{Negative control})] \times 100$ . The x-axis shows the concentration in μM. The data is an overlay of the baseline dose-response curves from figures 2 and 1S along with the dose-response curves of increasing DT2216 doses. The y-axis is marked with the matching dose-response values for DT2216 in the absence of any other drug.

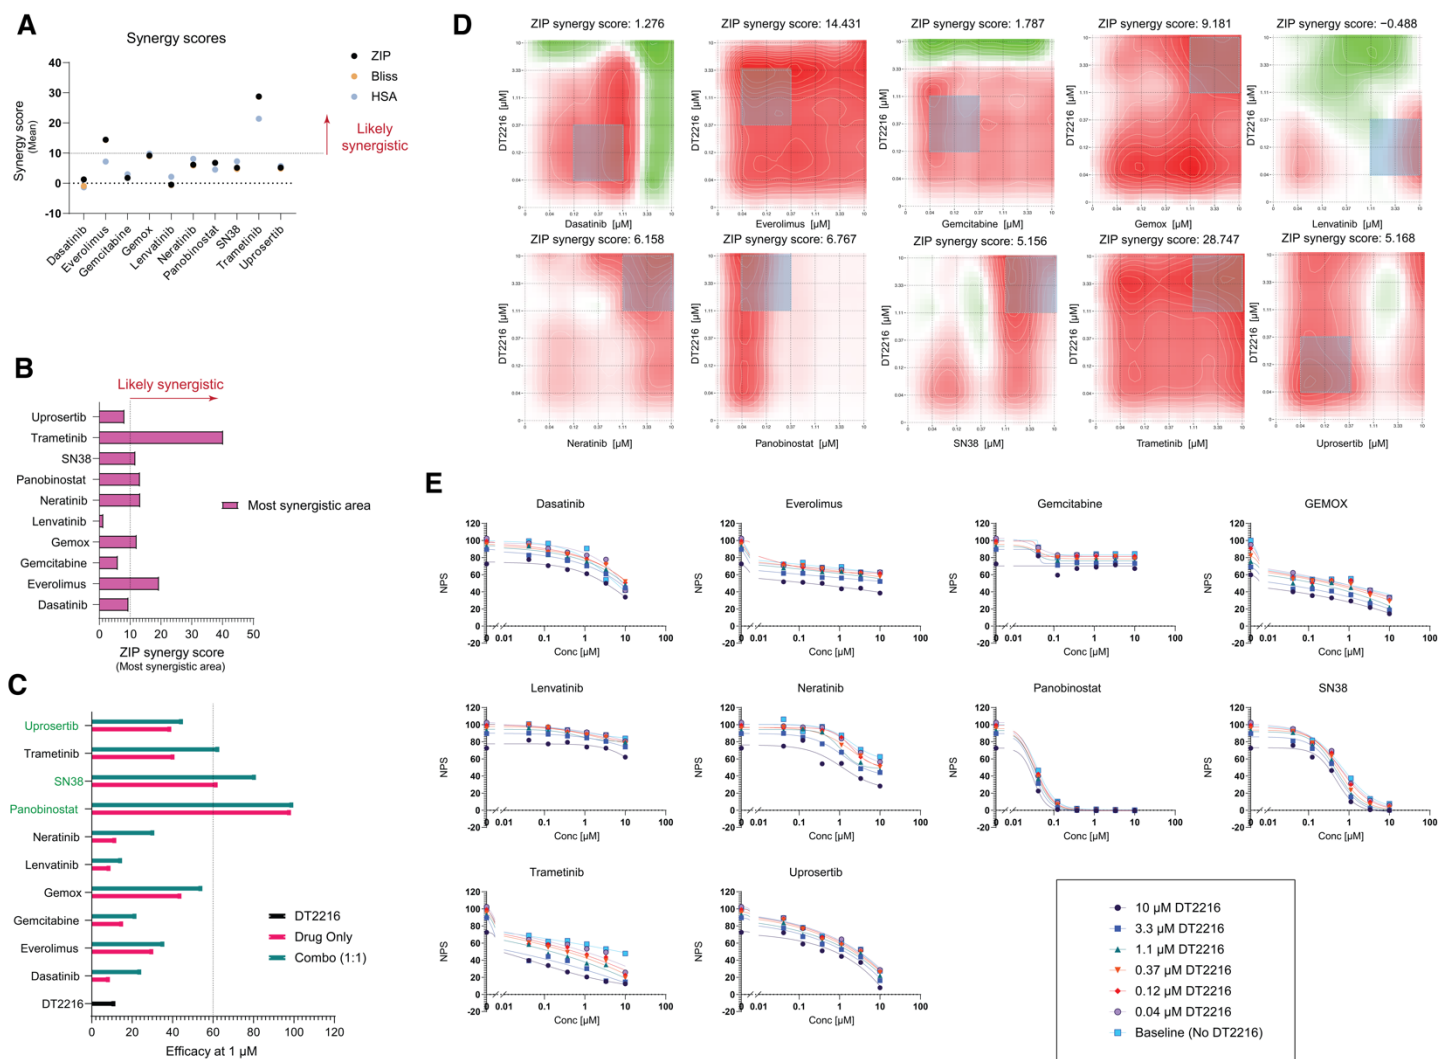

### Supplemental Figure 6:

**Fig. S6: DT2216 Anchor Screen for PDX 34.** **A.** Synergy scores (ZIP, Bliss and HSA) for DT2216 in PDX 34, **B.** The ZIP scores of the most synergistic area calculated for indicated drugs combined with DT2216, **C.** A plot of the efficacy (100% - Viability) at 1 μM for indicated drugs as single agents or combined with DT2216 (1:1), the dotted line marks the 60% efficacy, **D.** The 6 x 6 dose-response matrices and interaction landscapes of indicated drugs combined with DT2216. Cells were treated for 72 hrs and viability was measured using a cell-titer glo (Promega) assay, **E.** Dose-response curves of therapeutic agents in the screen vs an increasing dose of DT2216. Drugs were tested at 10 μM – 41 nM with 3-fold serial dilution. The y-axis shows normalized percentage survival calculated as  $[(\text{Positive control} - \text{drug response at a given dose}) / (\text{Positive control} - \text{Negative control})] \times 100$ . The x-axis shows the concentration in μM. The data is an overlay of the baseline dose-response curves from figures 2 and 1S along with the dose-response curves of increasing DT2216 doses. The y-axis is marked with the matching dose-response values for DT2216 in the absence of any other drug.



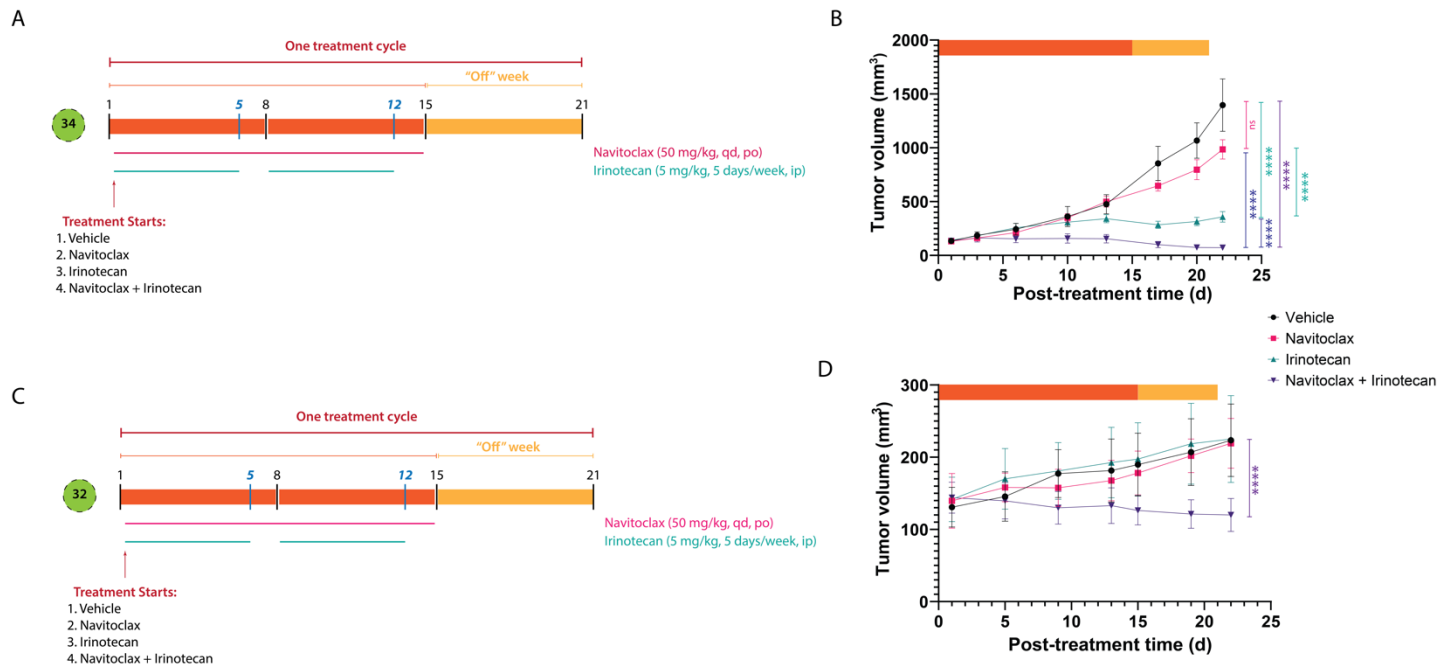

Supplemental Figure 7:

**Fig. S7: Navitoclax combined with irinotecan reduces tumor volume in FLC PDXs. A & C.** Illustration of treatment timeline for PDX 34 and PDX 32, respectively. Navitoclax was administered daily for two weeks, irinotecan was administered for five days a week for two weeks. The third week the mice are off the treatment. **B & D.** Changes in tumor volume over the course of treatment. Data are presented as the mean  $\pm$  SEM ( $n = 3$  for vehicle, and  $n = 4$  for other treatment groups at the start of treatment for PDX 34,  $n = 6$  for vehicle and combo treatment groups,  $n = 5$  for other treatment groups at the start of the treatment for PDX 32). \*\*\*\* $p < 0.0001$  in indicated comparisons; ns, not significant.

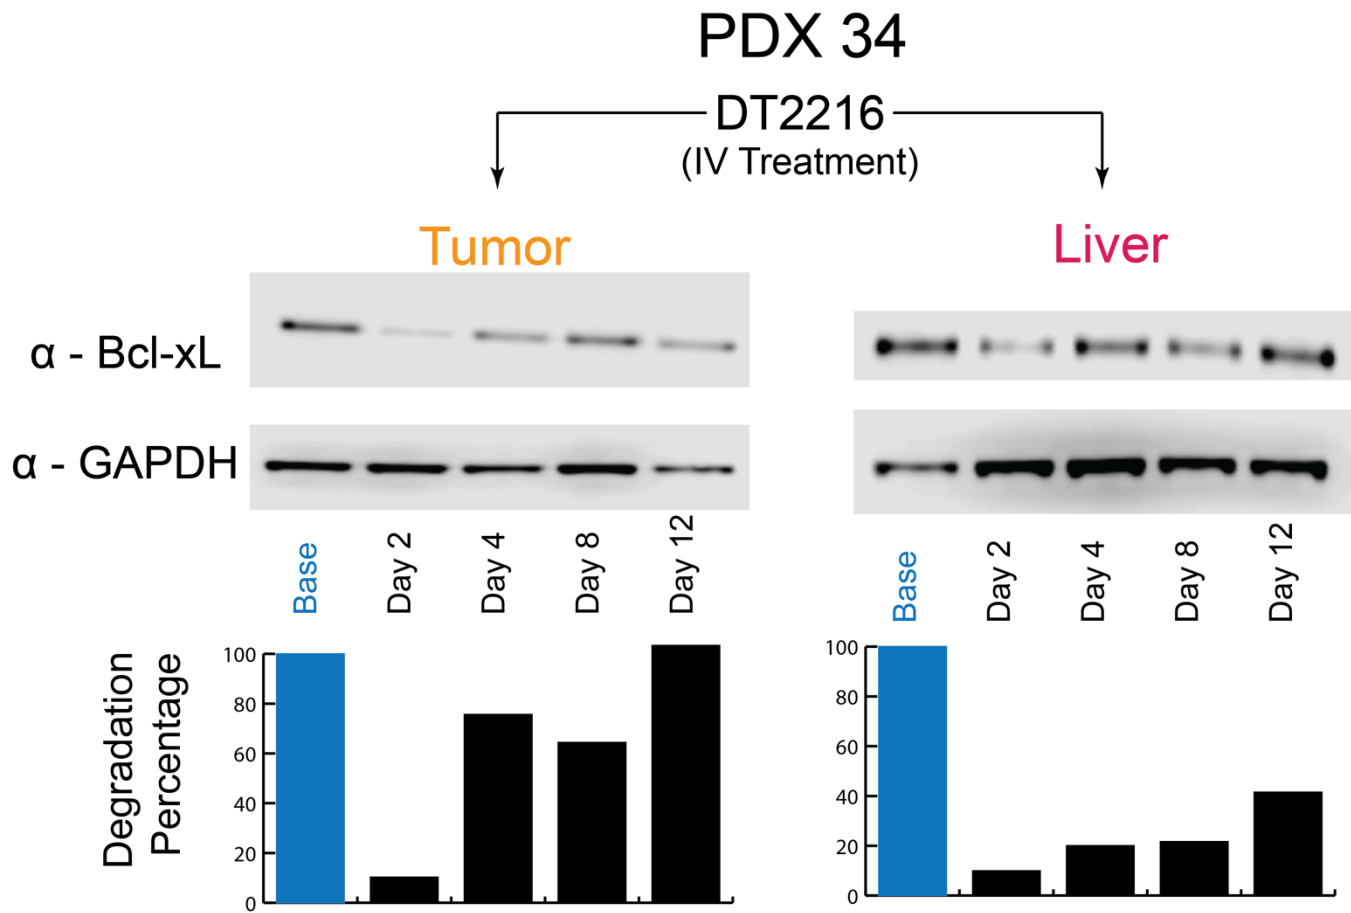

Supplemental Figure 8:

**Fig. S8: The IV formulation of DT2216 induces degradation in vivo in FLC PDXs.** PDX mice were treated with a single dose of the IV formulation and tumor tissue was collected from the tumor and liver of each mouse. Each time point represents an independent mouse. Bcl-xL level was monitored using Western blotting. GAPDH was used as a loading control for all immunoblot analysis presented. Data were corrected with a normalization factor against GAPDH, and presented as a percentage of the vehicle (Base) treated cells as a control. Upper panel shows the immunoblots, and the lower panel shows the densitometric analysis performed using LI-COR. PDX 34 treated with the IV formulation, tumor and liver samples, respectively.



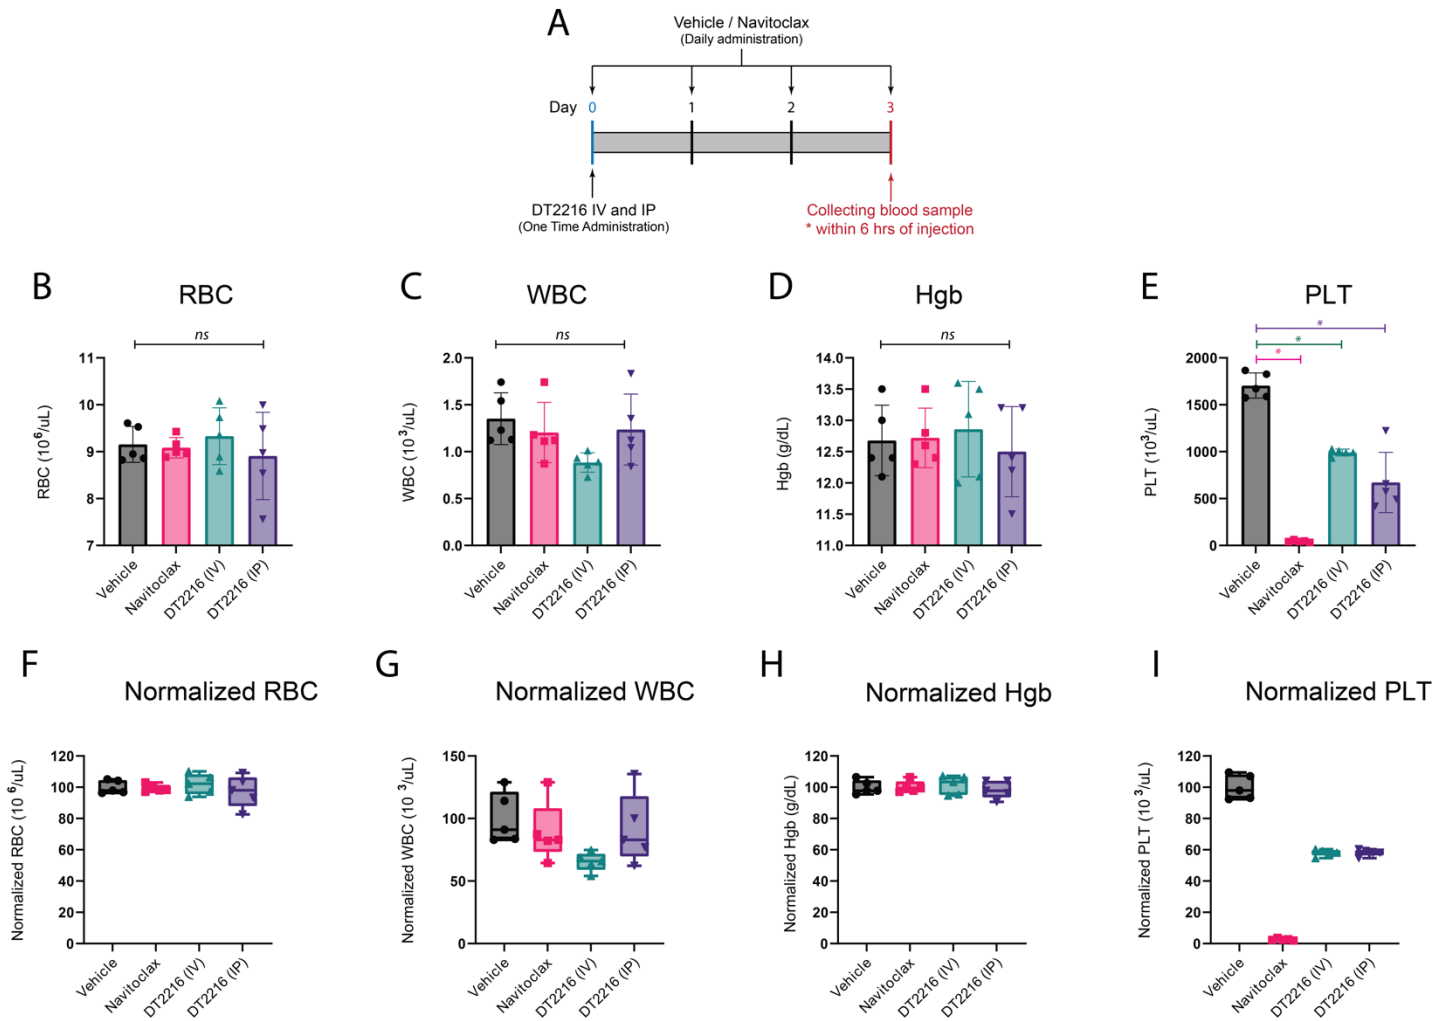

Supplemental Figure 9:

**Fig. S9: DT2216 does not cause severe thrombocytopenia.** **A.** Experimental design and timeline of treatment and blood collection, DT2216 was administered at 15 mg per kg body weight, IV: intravenous formulation, IP: intraperitoneal formulation, **B – I.** RBC: red blood cell count, WBC: white blood cell count, Hgb: hemoglobin, PLT: platelet count. **B – E.** Raw count, **F – I.** Count normalized to vehicle control. Data presented as mean  $\pm$  SD,  $n = 5$  for all groups at the start of the treatment, \*  $p < 0.01$  in indicated comparisons; **ns**, not significant. Each symbol represents data from an individual animal. Statistical significance was determined by one-way ANOVA and two-sided unpaired Student's t-test.

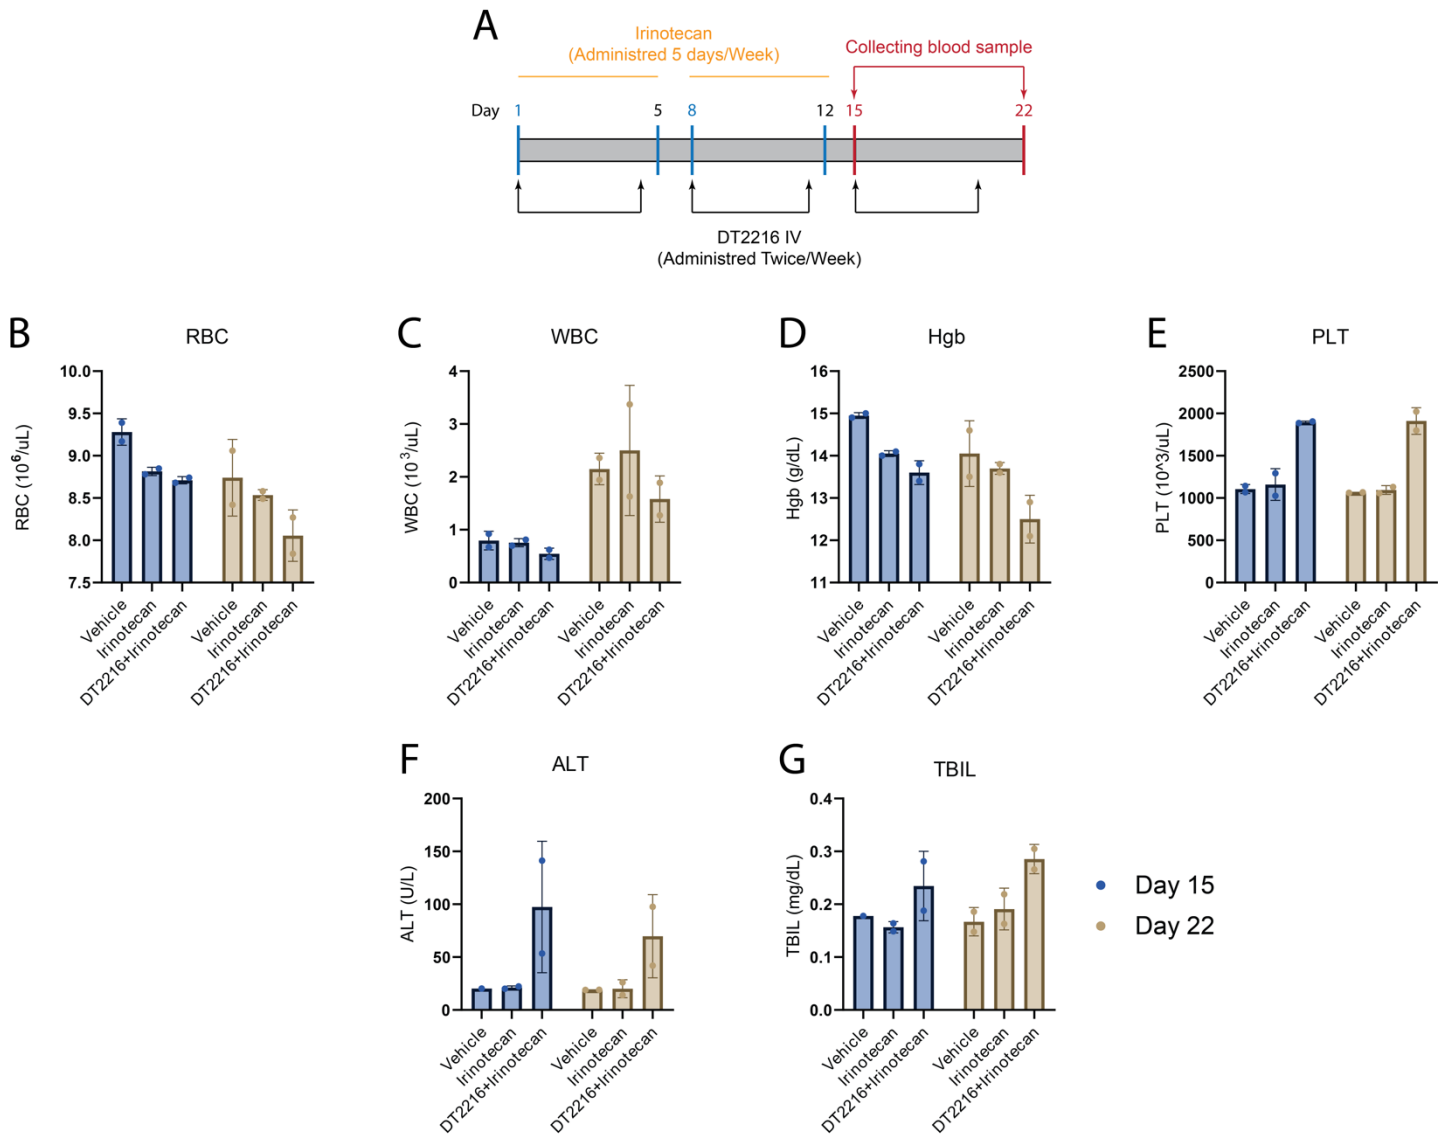

Supplemental Figure 10:

**Fig. S10: DT2216 can be safely administered in combination with irinotecan at clinically relevant doses.** **A.** Experimental design and timeline of treatment and blood collection, DT2216 was administered at 15 mg per kg body weight, IV: intravenous formulation, DT2216 was administered twice per week throughout the entire cycle, irinotecan was administered at 5 mg per kg body weight 5 days per week for two consecutive weeks, **B – E.** Raw count of RBC: red blood cell count, WBC: white blood cell count, Hgb: hemoglobin, PLT: platelets count, **F & G.** ALT: Alanine aminotransferase, TBIL: Total bilirubin. Data presented as mean  $\pm$  SD (n=2)

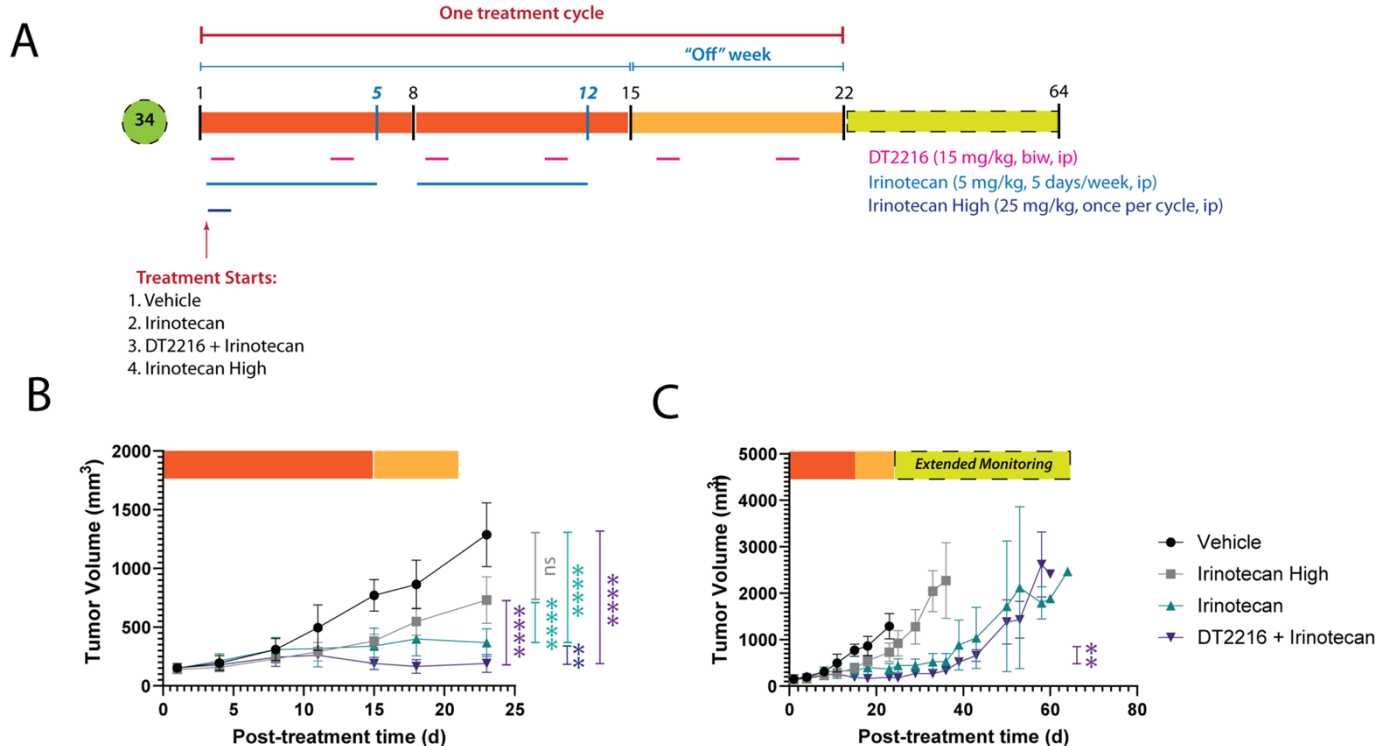

**Supplemental Figure 11**

**Fig. S11: A single high dose of irinotecan is not as efficient as more frequent lower doses of irinotecan. A.** Illustration of treatment timeline for PDX 34. DT2216 was administered IP twice a week for the entire treatment cycle, an intermediate dose of irinotecan (5 mg/kg) was administered IP for five days a week for two weeks. A high dose of irinotecan (25 mg/kg) was administered once IP. The third week the mice were off the treatment with low-dose irinotecan. **B.** Changes in tumor volume over the course of the treatment cycle. Data is presented as the mean  $\pm$  SEM ( $n = 5$  for all treatment groups at the start of the treatment for PDX 34), **C.** Changes in tumor volume over the entire timeline (treatment cycle + extended monitoring beyond treatment). \*\* $p < 0.01$  and \*\*\*\* $p < 0.0001$  in indicated comparisons.
